# Supplementary material
Source: Springer Nature journal article supplement (https://www.springermedizin.de/resource/supplementary/12943_2013_1505_MOESM5_ESM.pdf/9552280)
Supplement: MOESM5 [file 9552280]

A

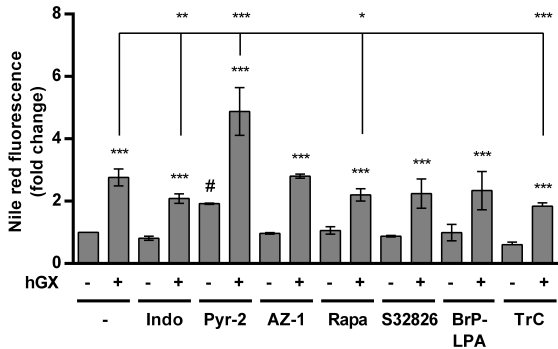

B

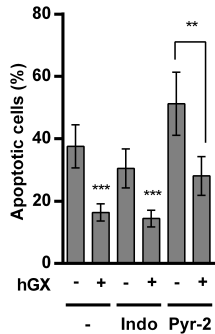

Fig. S4
